# Supplementary material
Source: Research Square preprint supplement (doi:10.21203/rs.3.rs-9107151/v1)
Supplement: Supplementary file 1 [file 08397c2777ce8db51e79b506.docx]

**Table S1.** Sociodemographic and professional characteristics across latent profiles and reference threshold–based groups (n = 653)

| **Variables** | **The three latent profiles** | | | | | **Classification Based on the Reference Threshold** | | | |
| --- | --- | --- | --- | --- | --- | --- | --- | --- | --- |
| **Class 1** | **Class 2** | **Class 3** | ***P*** | **Effect size** | **Lower safety (<101)** | **Higher safety (≥101)** | ***P*** | **Effect size** |
| Gender | | | | 0.013 | Cramer’s V = 0.115 |  |  | 0.641 | - |
| Female | 97 | 326 | 130 |  |  | 408 | 145 |  |  |
| Male | 30 | 48 | 22 | 76 | 24 |
| ***Age (years)*** | | | | 0.674 | - |  |  | 0.636 | - |
| 20-30 | 57 | 158 | 68 |  |  | 209 | 74 |  |  |
| 31-40 | 66 | 199 | 81 | 255 | 91 |
| >40 | 4 | 17 | 3 | 20 | 4 |
| ICU experience ***(years)*** | | | | 0.914 | - |  |  | 0.448 | - |
| 1-5 | 50 | 133 | 64 |  |  | 175 | 72 |  |  |
| 6-10 | 39 | 128 | 48 | 161 | 54 |
| 11-15 | 21 | 53 | 24 | 74 | 24 |
| >15 | 10 | 24 | 10 | 32 | 12 |
| Education level | | | | 0.006 | Cramer’s V = 0.106 |  |  | 0.003 | Cramer’s V = 0.166 |
| Junior College | 4 | 9 | 13 |  |  | 12 | 14 |  |  |
| Bachelor’s | 112 | 321 | 130 | 420 | 143 |
| Master’s | 11 | 44 | 9 | 52 | 12 |
| Type of ICU | | | | 0.218 | - |  |  | 0.013 | Cramer’s V = 0.002 |
| General ICU | 45 | 119 | 46 |  |  | 163 | 47 |  |  |
| Surgical ICU | 35 | 121 | 34 | 150 | 40 |
| Medical ICU | 29 | 84 | 45 | 106 | 52 |
| Emergency ICU | 18 | 50 | 27 | 65 | 30 |
| Professional title | | | | 0.966 | - |  |  | 0.911 | - |
| Primary nurse | 12 | 30 | 14 |  |  | 42 | 14 |  |  |
| Senior nurse | 38 | 122 | 48 | 154 | 54 |
| Nursing Supervisor | 77 | 222 | 90 | 288 | 101 |
| Specialist Nurse | | | | 0.230 | - |  |  | 0.230 | Cramer’s V = 0.074 |
| No | 83 | 225 | 84 |  |  | 301 | 91 |  |  |
| Yes | 44 | 149 | 68 | 183 | 78 |
| Participate in IHT-related training | | | | 0.007 | Cramer’s V = 0.123 |  |  | 0.008 | Cramer’s V = 0.003 |
| No | 26 | 47 | 12 |  |  | 73 | 12 |  |  |
| Yes | 101 | 327 | 140 | 411 | 157 |
| Utilisation of the IHT Checklist | | | | <0.001 | Cramer’s V = 0.217 |  |  | <0.001 | Cramer’s V = 0.002 |
| No | 54 | 97 | 20 |  |  | 149 | 22 |  |  |
| Yes | 73 | 277 | 132 | 335 | 147 |
| Fear of IHT | 5.69 | 5.10 | 4.23 | <0.001 | η2 = 0.033 | 5.31 | 4.15 | <0.001 | Cohen’s d = 0.451 |
| Confidence in IHT | 7.68 | 8.37 | 9.27 | <0.001 | η2 = 0.080 | 8.17 | 9.25 | <0.001 | Cohen’s d = 0.613 |

**Note:**

Class 1, Class 2, and Class 3 represent latent profile analysis (LPA)–derived groups characterized by lower, moderate, and higher perceived intrahospital transport safety, respectively.

Reference threshold–based groups were defined according to whether participants’ IHTSS total scores fell below (<101) or met/exceeded (≥101) the internally derived reference threshold.

Categorical variables were compared using chi-square tests and are presented as n (%). Continuous variables are presented as mean (SD) and were compared using independent-sample t-tests or one-way analysis of variance, as appropriate.

Effect sizes are reported as Cramer’s V for categorical variables, η² for analysis of variance, and Cohen’s d for mean comparisons.

All classifications are based on perceived IHT safety and are intended for exploratory and descriptive purposes only.
